# Supplementary material
Source: Springer Nature journal article supplement (https://www.springermedizin.de/resource/supplementary/12936_2007_349_MOESM5_ESM.pdf/9547610)

**A**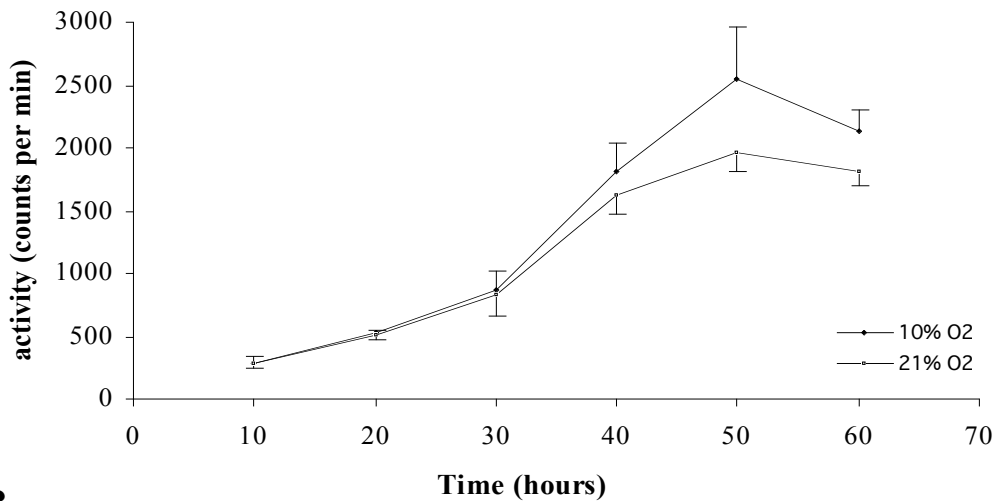**B**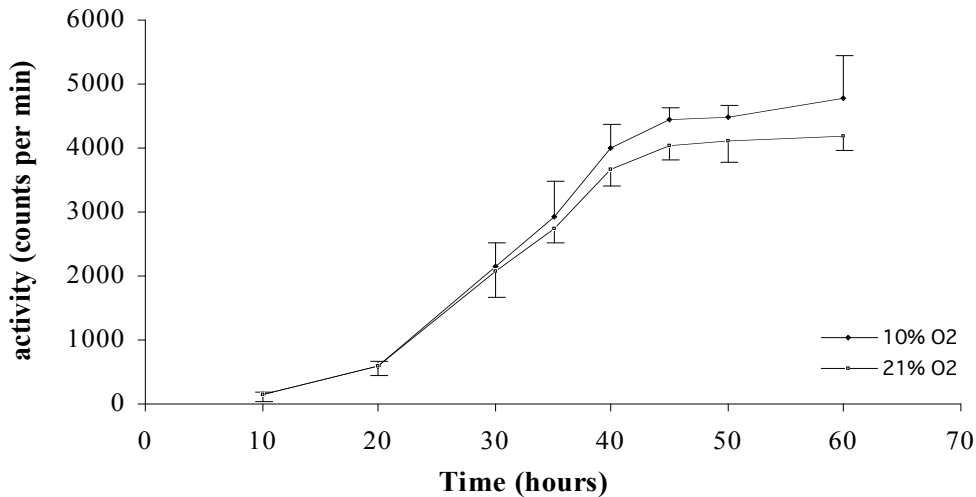

Supplement: MOESM5 [file 9547610]
